# Supplementary material
Source: MDPI journal article supplement (https://www.mdpi.com/2039-4403/13/3/110)
Supplement: s1 [file s1]

## **Supplement File S1. The questionnaire**

(response alternatives in parenthesis)

**What advanced nursing education do you have/are you studying?** (advanced clinical generalist, cancer, critical care, emergency care, midwifery, nurse anesthetist, operating room, pediatric, public health, other)

**If you responded 'other', please specify** (text)

**Are you an advanced nurse or a student?** (advanced nurse, student, neither)

**What is your current position?** (administration, clinician, leader, professional development, researcher, teacher, other)

**If you are an advanced nurse: how many students in advanced nursing have you supervised throughout your career?** (insert number)

**Please report to what extent you disagree or agree on that clinical nursing experience impact on:**

- Development of an individual nursing identity
- Experience with communication with patients
- Experience with communication with relatives
- Experience with medical equipment
- Experience with basic procedures
- Experience with advanced procedures
- Experience with interprofessional collaboration
- Experience with documentation
- Experience with independent task solving
- Development of situational awareness
- Development of awareness of own role in teams
- Development of an ability to provide personcentred nursing
- Increased patient safety
- Increased efficacy
- Development of a feeling of security in the provision of nursing care

(1=totally disagree, 2=disagree, 3=neither disagree nor agree, 4=agree, 5=totally agree)

**If you have experience with supervising students in advanced nursing: Please report to what extent you disagree or agree on the following statements:**

- There is NO association between the number of years of clinical experience and nurses' ability to achieve the learning outcomes
- There is NO association between the nature of the clinical experience and nurses' ability to achieve the learning outcomes
- The students' ability to achieve the learning outcomes depends more on personal assets than on clinical experience

(1=totally disagree, 2=disagree, 3=neither disagree nor agree, 4=agree, 5=totally agree)

**Please report to what extent you disagree or agree on the following statements:**

- **Clinical nursing experience should be a prerequisite before entry to advanced nursing programs**
- **Knowledge, skills and general competence may be achieved through the specialization, and hence should not be a prerequisite**
- **Clinical nursing experience from specialized wards should be a prerequisite before entry to advanced nursing programs**
- **Clinical nursing experience should NOT be a prerequisite before entry to advanced nursing programs**
- **The educational institutions themselves should decide their own prerequisites**
- **Prerequisites should be similar across educational institutions to ensure a national standard of advanced nurses**

(1=totally disagree, 2=disagree, 3=neither disagree nor agree, 4=agree, 5=totally agree)

Text responses:

**What is the advantage of having clinical experience previous to entry to an advanced nursing program?**

**What is the disadvantage of having clinical experience previous to entry to an advanced nursing program?**
